# Supplementary material for: Enhanced Antitumor Efficacy of PhAc-ALGP-Dox, an Enzyme-Activated Doxorubicin Prodrug, in a Panel of THOP1-Expressing Patient-Derived Xenografts of Soft Tissue Sarcoma
Source: MDPI journal article supplement (doi:10.3390/biomedicines10040862), 2022-04-06
Supplement: s1 [file s1]

# Supplementary Material

**Table S1.** Thimet oligopeptidase (THOP1) expression and tumor growth delay in the patient-derived sarcoma xenografts as determined by enzyme-linked immunoassay (ELISA) and immunohistochemistry (IHC).

| Xenografts                   | THOP1 IHC<br>SCORE | THOP1 ELISA<br>(ng/g total protein) | Tumor Growth Delay (day 29) |         |
|------------------------------|--------------------|-------------------------------------|-----------------------------|---------|
|                              |                    |                                     | CBR-049                     | CBR-050 |
| UZLX-STs84 <sup>UPS</sup>    | 0                  | 22.67 ± 3.15                        | 52.95                       | 29.28   |
| UZLX-STs216 <sup>MFS</sup>   | 1                  | 143.27 ± 50.82                      | 77.65                       | n/d     |
| UZLX-STs234 <sup>eOS</sup>   | 1                  | 197.60 ± 37.26                      | 47.39                       | n/d     |
| UZLX-STs211A <sup>UPS</sup>  | 1                  | 224.04 ± 59.37                      | 59.72                       | n/d     |
| UZLX-STs22 <sup>LMS</sup>    | 2                  | 26.84 ± 1.80                        | 71.34                       | 10.81   |
| UZLX-STs7 <sup>SynSa</sup>   | 2                  | 74.81 ± 13.55                       | 75.75                       | 31.38   |
| UZLX-STs128 <sup>LMS</sup>   | 2                  | 203.86 ± 22.06                      | 81.89                       | 15.46   |
| UZLX-STs204 <sup>DDLPS</sup> | 2                  | 299.36 ± 6.38                       | 78.01                       | n/d     |
| UZLX-STs89 <sup>MFS</sup>    | 3                  | 29.98 ± 8.04                        | 94.78                       | 87.24   |
| UZLX-STs185 <sup>IS</sup>    | 3                  | 171.31 ± 23.71                      | 86.39                       | 59.57   |

DDLPS: dedifferentiated liposarcoma; eOS: extraskeletal osteosarcoma; IHC: immunohistochemistry; IS: intimal sarcoma; LMS: leiomyosarcoma; MFS: myxofibrosarcoma; n/d: not done; SynSa: synovial sarcoma; UPS: undifferentiated pleomorphic sarcoma; 0: negative; 1: weakly positive; 2: intermediate positive; 3: strongly positive.

**Table S2.** Detailed description on the number of mice/tumors included in each experiment. Data represent number of mice/tumors at begin of the experiment (day 1) and number mice/tumors at the day of statistical analysis (day 36/day 29) between brackets.

| Xenografts                   | Control | Doxo    | CBR-049 | CBR-050 | Aldoxo  |
|------------------------------|---------|---------|---------|---------|---------|
| UZLX-STs7 <sup>SynSa</sup>   | 12 (4)  | 12 (11) | 10 (9)  | 8 (4)   | n/d     |
| UZLX-STs22 <sup>LMS</sup>    | 7 (3)   | 7 (4)   | 8 (6)   | 8 (4)   | n/d     |
| UZLX-STs84 <sup>UPS</sup>    | 9 (4)   | 9 (8)   | 10 (6)  | 10 (3)  | n/d     |
| UZLX-STs89 <sup>MFS</sup>    | 11 (9)  | 11 (11) | 11 (10) | 11 (10) | n/d     |
| UZLX-STs128 <sup>LMS</sup>   | 10 (8)  | 10 (9)  | 10 (9)  | 10 (7)  | n/d     |
| UZLX-STs185 <sup>IS</sup>    | 9 (5)   | 9 (8)   | 10 (8)  | 10 (7)  | n/d     |
| UZLX-STs204 <sup>DDLPS</sup> | 10 (9)  | 12 (12) | 12 (12) | n/d     | 12 (12) |
| UZLX-STs211A <sup>UPS</sup>  | 10 (10) | 12 (12) | 12 (11) | n/d     | 12 (12) |
| UZLX-STs216 <sup>MFS</sup>   | 10 (10) | 12 (11) | 12 (12) | n/d     | 12 (9)  |
| UZLX-STs234 <sup>eOS</sup>   | 10 (10) | 11 (11) | 12 (12) | n/d     | 11 (7)  |

DDLPS: dedifferentiated liposarcoma; eOS: extraskeletal osteosarcoma; IS: intimal sarcoma; LMS: leiomyosarcoma; MFS: myxofibrosarcoma; n/d: not done; SynSa: synovial sarcoma; UPS: undifferentiated pleomorphic sarcoma.

**Table S3.** Relative tumor volumes compared to baseline (%) at the day of statistical analysis presented as average  $\pm$  standard deviation. DDLPS: dedifferentiated liposarcoma; eOS: extraskeletal osteosarcoma; IS: intimal sarcoma; LMS: leiomyosarcoma; MFS: myxofibrosarcoma; n/d: not done; SynSa: synovial sarcoma; UPS: undifferentiated pleomorphic sarcoma; \*  $p < 0.05$  compared to control; #  $p < 0.05$  compared to doxorubicin (doxo); \*\*  $p < 0.005$  compared to control; ##  $p < 0.005$  compared to doxo; \*\*\*  $p < 0.0005$  compared to control; ###  $p < 0.0005$  compared to doxo.

|               | <b>Xenograft model</b>       | <b>Control</b>  | <b>Doxo</b>     | <b>CBR-049</b>     | <b>CBR-050</b>  | <b>Aldoxo</b>      |
|---------------|------------------------------|-----------------|-----------------|--------------------|-----------------|--------------------|
| <b>Day 36</b> | UZLX-ST57 <sup>SynSa</sup>   | 1801 $\pm$ 1269 | 135 $\pm$ 108** | 187 $\pm$ 235*     | 998 $\pm$ 317## | n/d                |
|               | UZLX-ST522 <sup>LMS</sup>    | 1098 $\pm$ 824  | 962 $\pm$ 542   | 190 $\pm$ 28*#     | 604 $\pm$ 275   | n/d                |
|               | UZLX-ST584 <sup>UPS</sup>    | 2800 $\pm$ 1398 | 1579 $\pm$ 1087 | 486 $\pm$ 503*#    | 1799 $\pm$ 130  | n/d                |
|               | UZLX-ST589 <sup>MFS</sup>    | 898 $\pm$ 556   | 154 $\pm$ 190** | 51 $\pm$ 20***##   | 238 $\pm$ 249** | n/d                |
|               | UZLX-ST5128 <sup>LMS</sup>   | 775 $\pm$ 338   | 508 $\pm$ 154   | 62 $\pm$ 43***##   | 661 $\pm$ 389   | n/d                |
|               | UZLX-ST5185 <sup>IS</sup>    | 2804 $\pm$ 984  | 938 $\pm$ 381** | 444 $\pm$ 252***## | 1340 $\pm$ 822  | n/d                |
| <b>Day 29</b> | UZLX-ST5204 <sup>DDLPS</sup> | 559 $\pm$ 350   | 276 $\pm$ 162   | 123 $\pm$ 43***##  | n/d             | 125 $\pm$ 49***##  |
|               | UZLX-ST5211A <sup>UPS</sup>  | 657 $\pm$ 275   | 502 $\pm$ 209*  | 265 $\pm$ 90***##  | n/d             | 275 $\pm$ 119***## |
|               | UZLX-ST5216 <sup>MFS</sup>   | 786 $\pm$ 569   | 491 $\pm$ 333   | 176 $\pm$ 242***## | n/d             | 82 $\pm$ 54***###  |
|               | UZLX-ST5234 <sup>eOS</sup>   | 453 $\pm$ 219   | 451 $\pm$ 284   | 238 $\pm$ 79**#    | n/d             | 257 $\pm$ 72*#     |

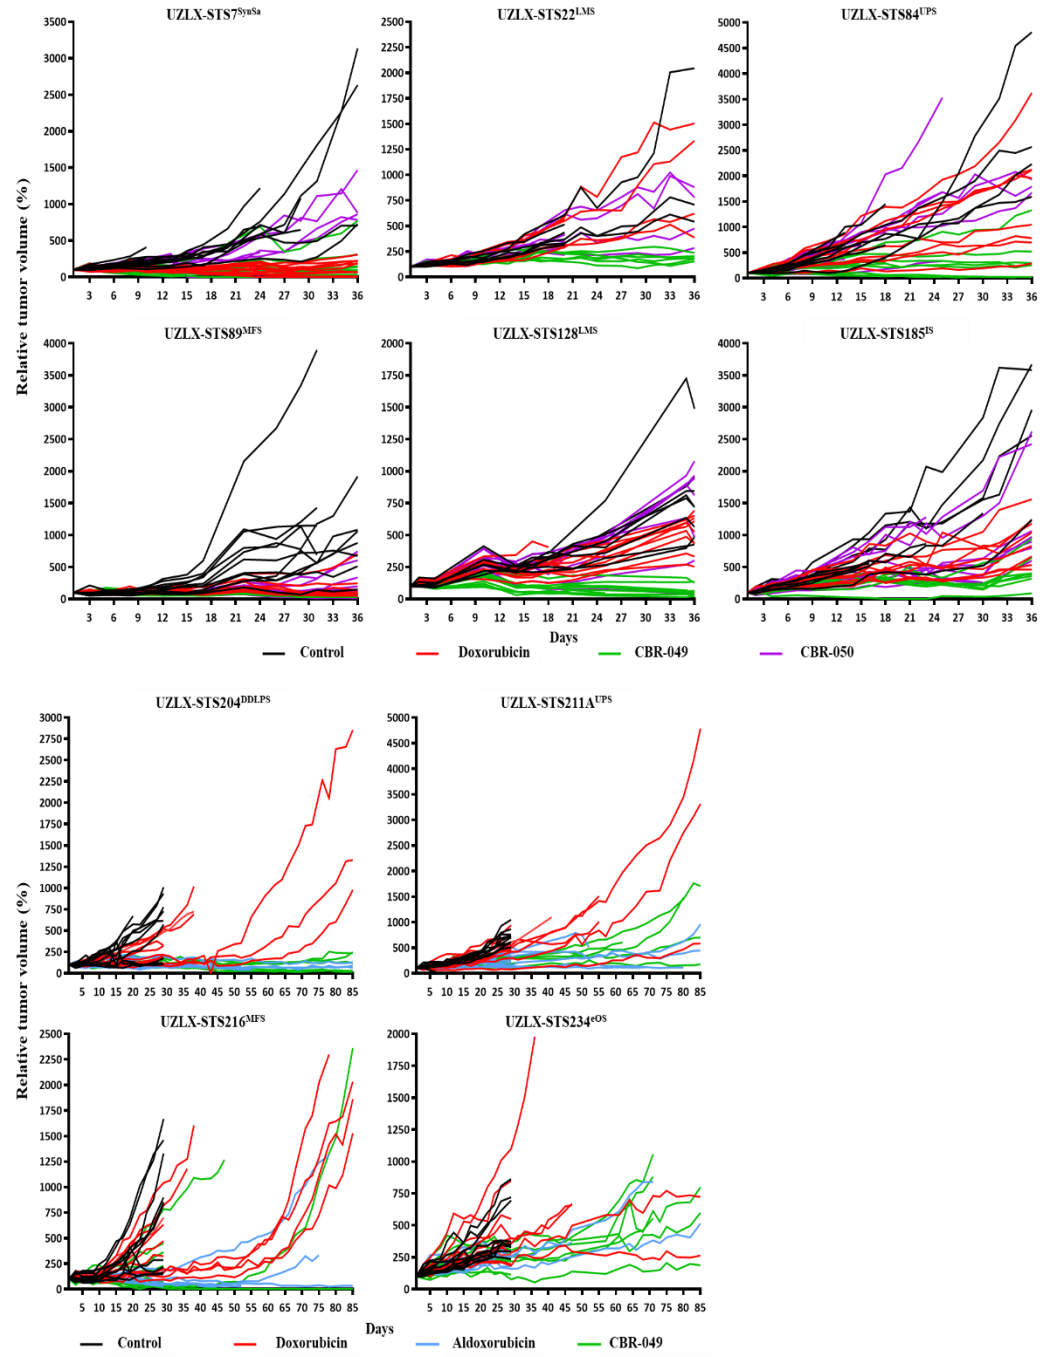

Figure S1. Individual relative tumor growth curves of all ten xenograft experiments.

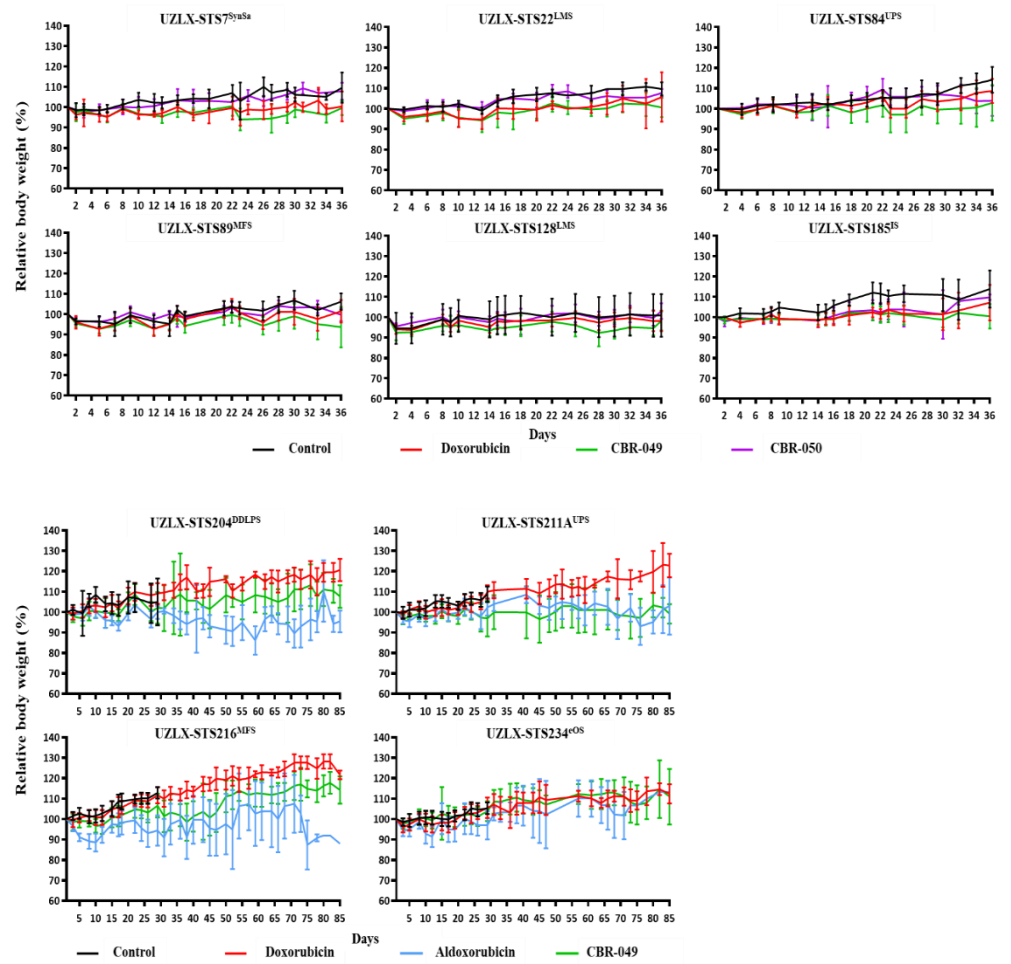

**Figure S2.** Relative body weight (%) compared to baseline in all ten patient-derived sarcoma xenografts included in this study, presented as average  $\pm$  standard deviation.
